# Supplementary material for: The therapeutic potential of exercise for improving mobility in multiple sclerosis
Source: PubMed Central journal article supplement (PMC11427913; doi:10.3389/fphys.2024.1477431), 2024-09-13
Supplement: Table1.pdf [file Table1.pdf]

**Supplemental Table 1: Reviews and meta-analysis of exercise studies assessing musculoskeletal**

**parameters in pwMS**

| Type of Exercise (RT or AT) | Duration (weeks) | Improved Functional Parameter(s)                                                      | Number of Studies with Improvements/Total Number of Studies | Reference                      |
|-----------------------------|------------------|---------------------------------------------------------------------------------------|-------------------------------------------------------------|--------------------------------|
| AE                          | 3-26             | VO <sub>2</sub> peak, walking capacity (6MWT)                                         | 7/14                                                        | (Taul-Madsen et al., 2021)     |
| RT                          | 8-24             | Muscle strength                                                                       | 7/7                                                         | (Taul-Madsen et al., 2021)     |
| RT                          | 5-24             | Muscle strength<br>Gait                                                               | 5/6<br>4/8                                                  | (Cano-Sánchez et al., 2024)    |
| RT                          | > 6              | Strength in lower limb<br>Gait speed<br>Walking distance<br>TUG<br>Fatigue resistance | n/a<br>(meta-analysis)                                      | (Andreu-Caravaca et al., 2023) |

AE: Aerobic Exercise, RT: Resistance Exercise, TUG: Timed Up and Go
